# Supplementary material for: In situ growth of spinel CoFe2O4 nanoparticles on rod-like ordered mesoporous carbon for bifunctional electrocatalysis of both oxygen reduction and oxygen evolution
Source: Royal Society of Chemistry journal article supplement (doi:10.1039/c5ta02625c), 2015-01-01
Supplement: c5ta02625c1.pdf [file c5ta02625c1.pdf]

## Electronic Supplementary Information:

### ***In-situ* growth of spinel CoFe<sub>2</sub>O<sub>4</sub> nanoparticles on rod-like ordered mesoporous carbon for bifunctional electrocatalysis of both oxygen reduction and oxygen evolution**

Pengxi Li,<sup>a,b</sup> Ruguang Ma,<sup>a,c,d</sup> Yao Zhou,<sup>a,c,d</sup> Yongfang Chen,<sup>a,e</sup> Zhenzhen Zhou,<sup>a,c,d</sup> Guanghui Liu,<sup>a,c,d</sup> Qian Liu,<sup>\*a,c,d</sup> Guihua Peng,<sup>b</sup> Zhenhua Liang,<sup>\*b</sup> and Jiacheng Wang<sup>\*a,c,d</sup>

<sup>a</sup> State Key Laboratory of High Performance Ceramics and Superfine Microstructure, Shanghai Institute of Ceramics, Chinese Academy of Sciences, 1295 Dingxi Road, Shanghai 200050, China. [jiacheng.wang@mail.sic.ac.cn](mailto:jiacheng.wang@mail.sic.ac.cn); [qianliu@sunm.shenc.ac.cn](mailto:qianliu@sunm.shenc.ac.cn)

<sup>b</sup> State Key Laboratory Cultivation Base for the Chemistry and Molecular Engineering of Medicinal Resources, Ministry of Science and Technology of China, School of Chemistry & Pharmaceutical of Guangxi Normal University, Guilin 541004, Guangxi, China.

<sup>c</sup> Innovation Center for Inorganic Materials Genomic Science, Shanghai Institute of Ceramics, Chinese Academy of Sciences, Shanghai 200050, P. R. China.

<sup>d</sup> Shanghai Institute of Materials Genome, Shanghai 200444, P. R. China.

<sup>e</sup> University of the Chinese Academy of Sciences, Beijing 100049, P. R. China

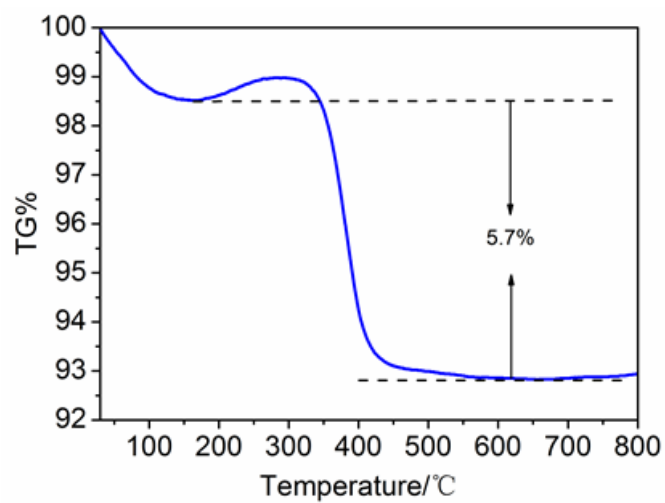

**Fig. S1** TG curve of CFO/RC-400 nanohybrid in an air flow from 30 to 800°C.

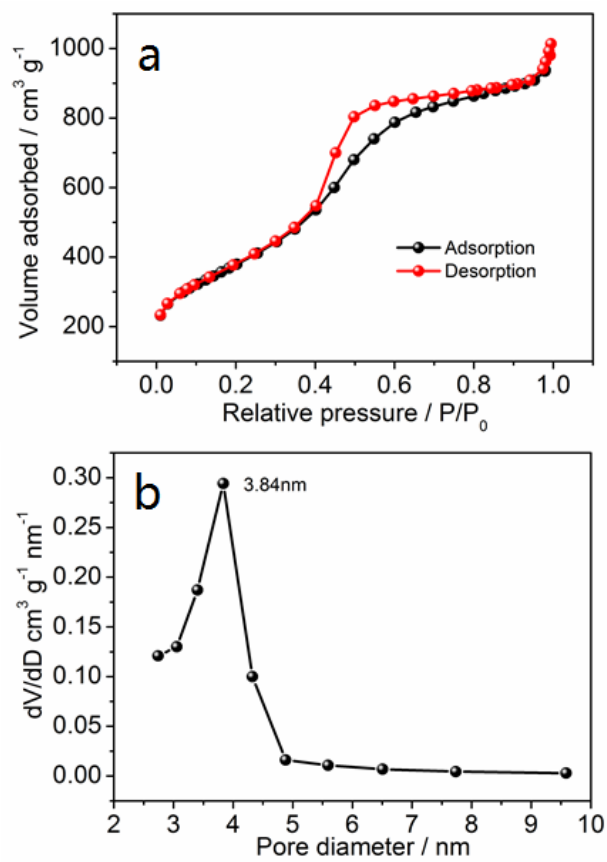

**Fig. S2**  $\text{N}_2$  adsorption-desorption isotherm loop (a) and pore size distribution (b) for pure RC.

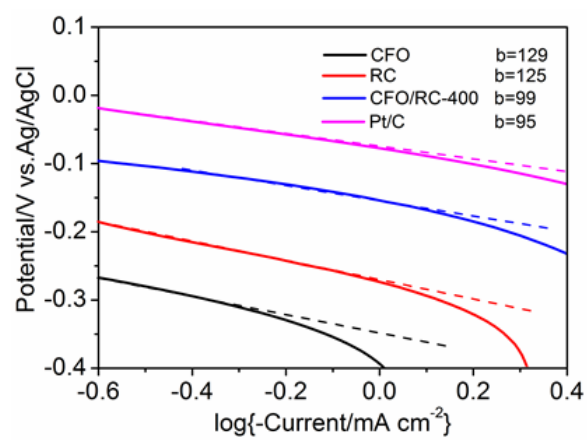

**Fig. S3** The corresponding Tafel plots of CFO, RC, CFO/RC-400 nanohybrid and commercial Pt/C calculated from the LSV curves measured in O<sub>2</sub>-saturated 0.1M KOH at a rotating speed of 1600 rpm.

**Table S1.** Comparison of bifunctional electrocatalytic activities of CFO/RC-400 nanohybrid with other non-precious catalysts.

| catalysts                                   | ORR                    |                                                          | OER                       |                                                         | Ref.      |
|---------------------------------------------|------------------------|----------------------------------------------------------|---------------------------|---------------------------------------------------------|-----------|
|                                             | onset potential<br>(V) | limit current density<br>at -0.9V (mA cm <sup>-2</sup> ) | onset<br>potential<br>(V) | limit current density<br>at 0.8V (mA cm <sup>-2</sup> ) |           |
| CoFe <sub>2</sub> O <sub>4</sub> /RC-400    | -0.10                  | 4.86                                                     | 0.41                      | 25.1                                                    | this work |
| NiCo <sub>2</sub> O <sub>4</sub> /graphene  | -0.11                  | 4.25                                                     | 0.55                      | 19.8                                                    | 1         |
| CoFe <sub>2</sub> O <sub>4</sub> /graphene  | -0.14                  | 6.15                                                     | 0.54                      | 13.6                                                    | 2         |
| CoFe <sub>2</sub> O <sub>4</sub> /biocarbon | -0.14                  | 6.11                                                     | 0.48                      | 17.7                                                    | 3         |

### References

1. D. U. Lee, B. J. Kim and Z. Chen, *J. Mater. Chem. A*, 2013, **1**, 4754.
2. W. Bian, Z. Yang, P. Strasser and R. Yang, *J. Power Sources*, 2014, **250**, 196.
3. S. Liu, W. Bian, Z. Yang, J. Tian, C. Jin, M. Shen, Z. Zhou and R. Yang, *J. Mater. Chem. A*, 2014, **2**, 18012.
